# Supplementary material for: In situ synthesis of pristine-graphene/Ag nanocomposites as highly sensitive SERS substrates
Source: Royal Society of Chemistry journal article supplement (doi:10.1039/c6ra20085k), 2016-01-01
Supplement: c6ra20085k1.pdf [file c6ra20085k1.pdf]

## Supporting Information

### In situ synthesis of pristine-graphene/Ag nanocomposites as highly sensitive SERS substrates

Xiujuan Wang, Chuhong Zhu, Zhulin Huang, Xiaoye Hu and Xiaoguang Zhu

Key Laboratory of Materials Physics, and Anhui Key Laboratory of Nanomaterials and Nanostructures, Institute of Solid State Physics, Chinese Academy of Sciences, Hefei 230031, P. R. China

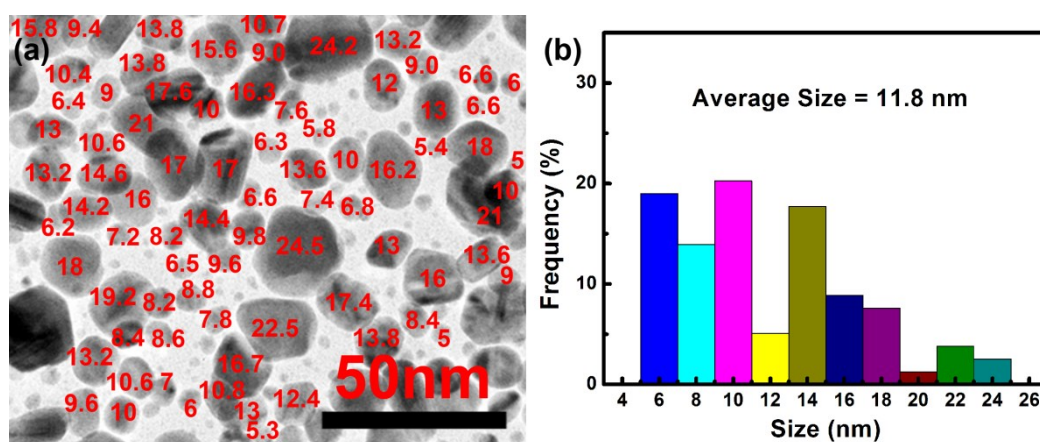

Fig. S1 (a) TEM image of pristine-graphene/Ag nanocomposites marked with Ag nanoparticle sizes. The Ag particles with sizes smaller than 5 nm is too small to be seen clearly and thus were not included in the statistic. (b) Distribution of Ag nanoparticle sizes shown in (a).

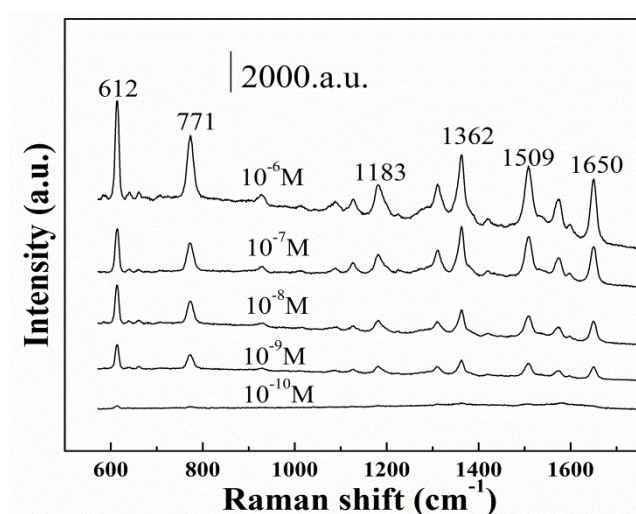

Fig. S2 SERS spectra of R6G at different concentrations on pristine-graphene/Ag nanocomposites.
